# Supplementary material for: Novel valleytronic and piezoelectric properties coexisting in Janus MoAZ3H (A = Si, or Ge; Z = N, P, or As) monolayers
Source: Royal Society of Chemistry journal article supplement (doi:10.1039/d4tc00188e), 2024-01-01
Supplement: d4tc00188e1.pdf [file d4tc00188e1.pdf]

## Supporting Materials

### **Novel valleytronic and piezoelectric properties coexisting in Janus MoAZ<sub>3</sub>H (A=Ge, Si; Z=N, P, As) monolayer**

Xiaolin Cai<sup>a\*</sup>, Guoxing Chen<sup>a</sup>, Rui Li<sup>a</sup>, Zhixiang Pan<sup>a</sup>, Yu Jia<sup>b, c\*</sup>

*<sup>a</sup>School of Physics and Electronic Information Engineering, Henan Polytechnic University, Jiaozuo 454000, China*

*<sup>b</sup>Key Laboratory for Special Functional Materials of Ministry of Education, Collaborative Innovation Center of Nano Functional Materials and Applications, School of Material Science and Engineering, Henan University, Kaifeng 475004, China*

*<sup>c</sup>International Laboratory for Quantum Functional Materials of Henan, and School of Physics and Microelectronics, Zhengzhou University, Zhengzhou 450001, China*

---

\* Address correspondence to E-mail: caixiaolin@hpu.edu.cn, jiayu@henu.edu.cn

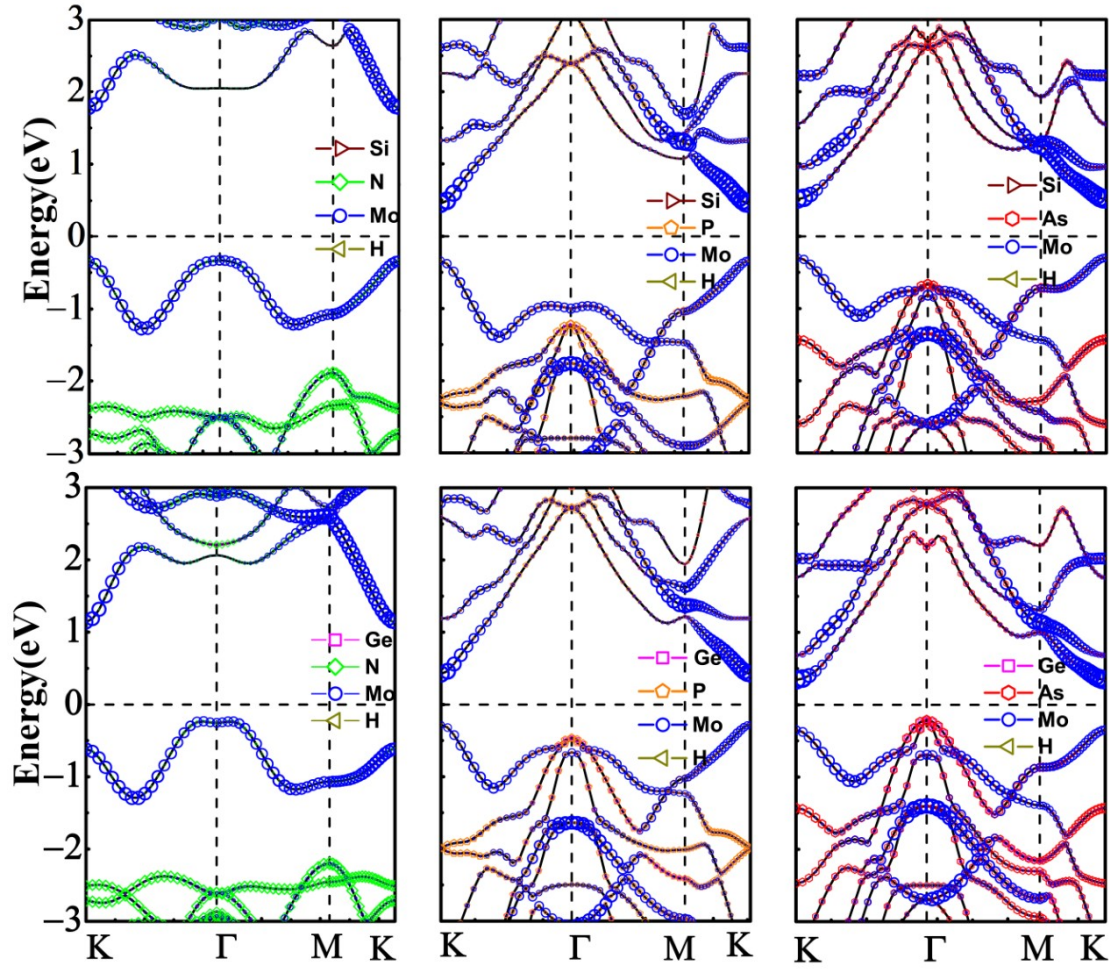

**Fig. S1** The projection map of each atomic band structure of MoAZ<sub>3</sub>H monolayer calculated by PBE function with Fermi level set to 0.

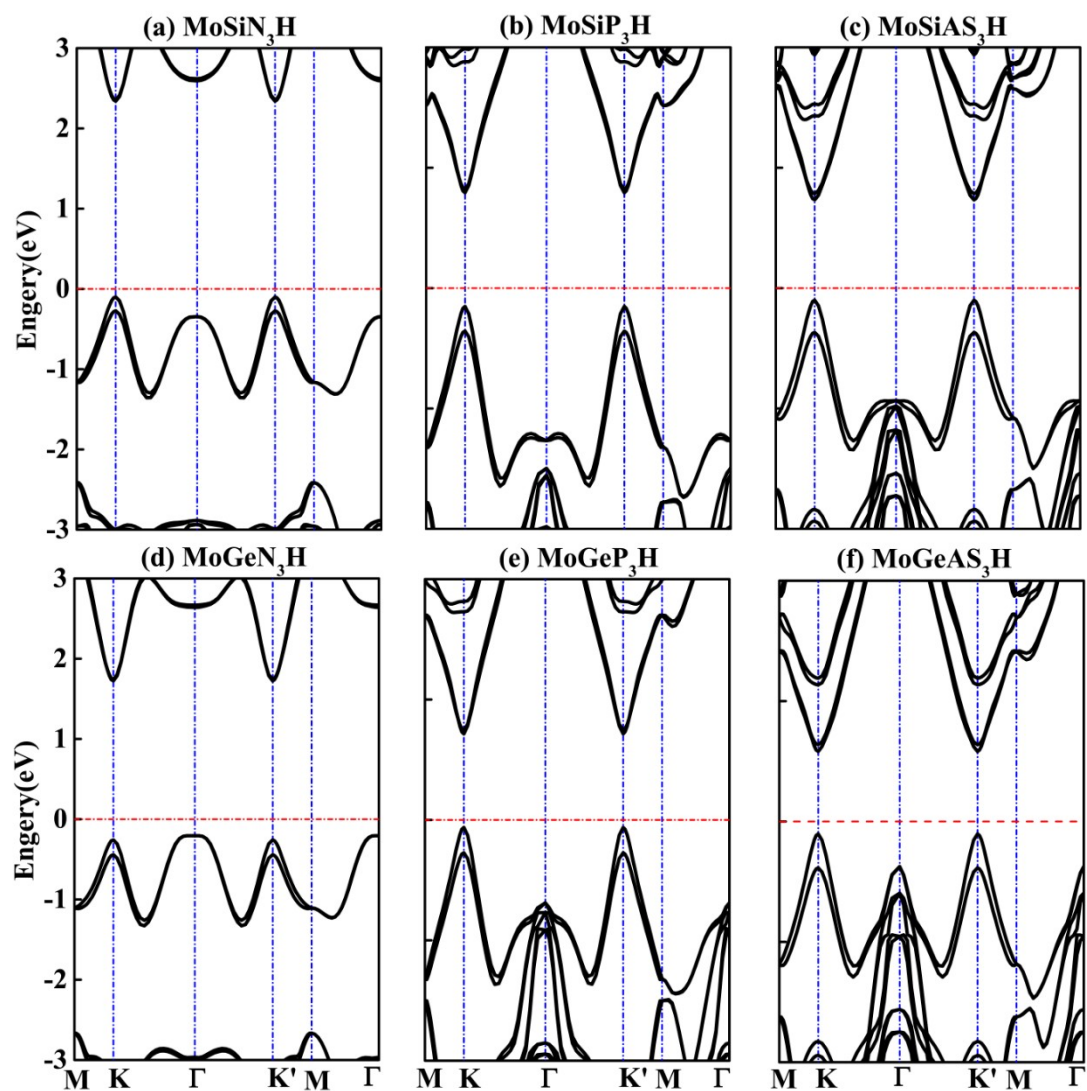

**Fig. S2** Band structure diagram of MoAZ<sub>3</sub>H monolayers calculated by HSE+SOC function, with Fermi energy level set to 0.

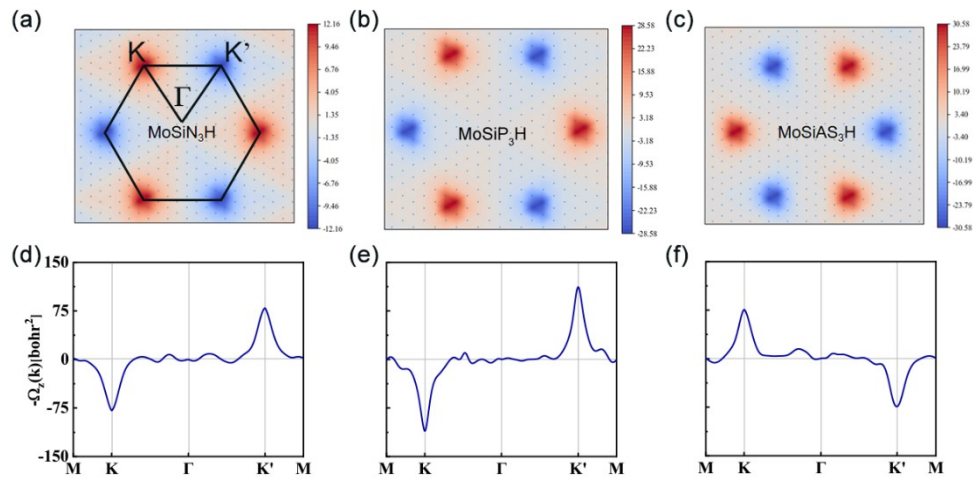

**Fig. S3** (a)–(c) are Berry curvature diagrams of Janus MoSiA<sub>3</sub>H (A = N, P, and As) ML in Brillouin zone. (d)–(f) are the corresponding Berry curvature curves along the high symmetry path.

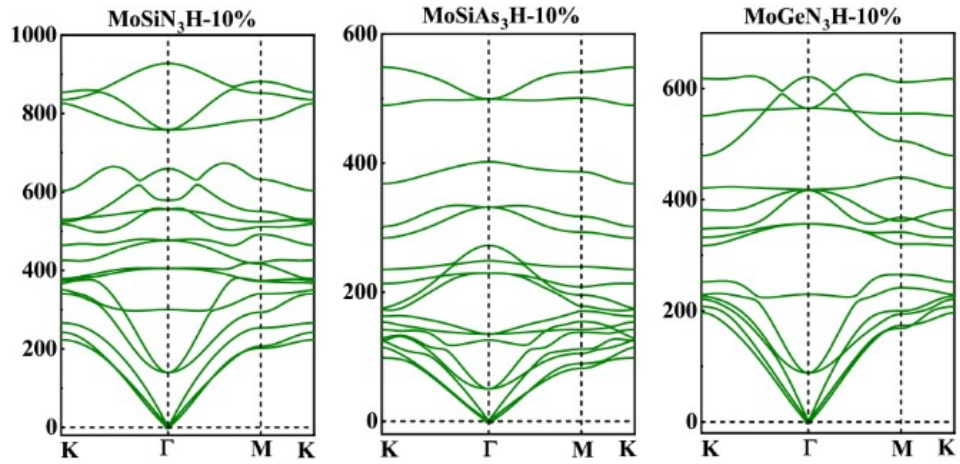

**Fig. S4** Phonon spectra of the MoSiN<sub>3</sub>H, MoSiAs<sub>3</sub>H and MoGeN<sub>3</sub>H under the tensile strain of 10%.
